1 **Large-scale deployment and establishment of *Wolbachia* into the *Aedes***  
2 ***aegypti* population in Rio de Janeiro, Brazil.**

3

4

5 **João Silveira Moledo Gesto<sup>1,3+</sup>, Sofia Pinto<sup>1,3+</sup>, Fernando Braga Stehling Dias<sup>2,3</sup>, Julia**

6 **Peixoto<sup>3</sup>, Guilherme Costa<sup>3</sup>, Simon Kutcher<sup>4</sup>, Jacqui Montgomery<sup>4</sup>, Benjamin R.**

7 **Green<sup>4</sup>, Peter A. Ryan<sup>4</sup>, Cameron P. Simmons<sup>4</sup>, Scott L. O'Neill<sup>4</sup>, Luciano Andrade**

8 **Moreira<sup>1,3\*</sup>**

9

10

11 <sup>1</sup> Grupo Mosquitos Vetores: Endossimbiontes e Interação Patógeno Vetor, Instituto René  
12 Rachou, Fiocruz Minas, Belo Horizonte, MG, Brazil.

13

14 <sup>2</sup> Gabinete da Presidência, Fiocruz, Rio de Janeiro, RJ, Brazil.

15

16 <sup>3</sup> World Mosquito Program, Fiocruz, Rio de Janeiro, RJ, Brazil.

17

18 <sup>4</sup> World Mosquito Program, Institute of Vector Borne Disease, Monash University, Clayton,

19 3800, Australia

20

21 \* Correspondence: [luciano.andrade@fiocruz.br](mailto:luciano.andrade@fiocruz.br)

22 + These authors contributed equally to this work.

23

24

25

26

27

28

29

## 30 **Abstract**

31 Traditional methods of vector control have proven insufficient to reduce the alarming  
32 incidence of Dengue, Zika and chikungunya in endemic countries. The bacterium symbiont  
33 *Wolbachia* has emerged as an efficient pathogen-blocking and self-dispersing agent that  
34 reduces the vectorial potential of *Aedes aegypti* populations and potentially impairs arboviral  
35 disease transmission. In this work, we report the results of a large-scale *Wolbachia*  
36 intervention in Ilha do Governador, Rio de Janeiro, Brazil. *wMel*-infected adults were  
37 released across residential areas between August 2017 and March 2020. Over 131 weeks,  
38 including release and post-release phases, we monitored the *wMel* prevalence in field  
39 specimens, and analyzed introgression profiles of two assigned intervention areas, RJ1 and  
40 RJ2. Our results revealed that *wMel* successfully invaded both areas, reaching overall  
41 infection rates of 50-70% in RJ1, and 30-60% in RJ2 by the end of the monitoring period. At  
42 the neighborhood-level, *wMel* introgression was heterogeneous in both RJ1 and RJ2, with  
43 some profiles sustaining a consistent increase in infection rates and others failing to elicit the  
44 same. Correlation analysis revealed a weak overall association between RJ1 and RJ2 ( $r =$   
45  $0.2849$ ,  $P = 0.0236$ ), and an association at a higher degree when comparing different  
46 deployment strategies, vehicle or backpack-assisted, within RJ1 ( $r = 0.4676$ ,  $P < 0.0001$ ) or  
47 RJ2 ( $r = 0.6263$ ,  $P < 0.0001$ ). The frequency *knockdown resistance* (*kdr*) alleles in *wMel*-  
48 infected specimens from both areas was consistently high over this study. Altogether, these  
49 findings corroborate that *wMel* can be successfully deployed at large-scale as part of vector  
50 control intervention strategies, and provide the basis for imminent disease impact studies in  
51 Southeastern Brazil.

52

53

54

## 55 **Background**

56 Fighting the mosquito *Aedes aegypti* (= *Stegomyia aegypti*) sounds almost like a mantra for  
57 human populations living the tropics, whose lives are constantly threatened by diseases  
58 attributed to this species. Dengue (DENV), Zika (ZIKV) and chikungunya (CHIKV) viruses  
59 are among the many etiological agents transmitted by *Ae. aegypti*, highlighting its status as a  
60 major disease vector (Kraemer et al. 2015; WHO 2017). Global estimates of DENV alone  
61 point to around 400 million annual infections (Bhatt et al. 2013), distributed in over 128  
62 countries (Brady et al. 2012). While the largest burden is in Asia (Bhatt et al. 2013), South  
63 American countries have long been hit by outbreaks and account for a considerable quota. In  
64 Brazil, notified cases of DENV sum up to 1.5 million annually, according to current  
65 surveillance reports (SVS 2019; 2021).

66 Without effective vaccines to tackle arboviral infections, public health authorities  
67 rely exclusively on vector control strategies (Thisyakorn and Thisyakorn 2014; Abdelnabi,  
68 Neyts, and Delang 2015; Lin et al. 2018). Management of breeding sites and deployment of  
69 chemical pesticides are the most common suppression methods, both with serious pitfalls. The  
70 former, usually performed by public agents and community members themselves, lacks  
71 precision and workforce, as suitable sites are vast in urban landscapes (Valença et al. 2013;  
72 Carvalho and Moreira 2017). In addition, *Ae. aegypti* egg loads are difficult to spot and  
73 remain viable for many months in nature (Rezende et al. 2008). As for the latter, natural  
74 selection of resistant variants has been the real issue (Maciel-de-Freitas et al. 2014; Melo  
75 Costa et al. 2020), downplaying the efficacy of current compounds and constantly pushing  
76 their replacement by new ones. Thus, innovative strategies tackling these issues and providing  
77 a more efficient, sustainable, control over arboviral infection are a welcome addition to  
78 traditional approaches in use.

79           One such strategy is the field deployment of *Wolbachia*-infected *Ae. aegypti*.  
80    *Wolbachia pipientis* is an obligatory intracellular bacterial endosymbiont, naturally present in  
81    around 40% of arthropods (Zug and Hammerstein 2012), which manipulates host  
82    reproductive biology to increase its inheritance rates (Werren, Baldo, and Clark 2008). When  
83    artificially introduced into *Ae. aegypti*, some *Wolbachia* strains such as *wMel* or the virulent  
84    *wMelPop* were able to trigger cytoplasmic incompatibility (CI) in reciprocal crosses with wild  
85    specimens, and rapidly invade confined populations (Walker et al. 2011). In addition, and of  
86    particular importance to arboviral disease control, these newly established *Wolbachia*-  
87    mosquito associations led to pathogen interference (PI) phenotypes, possibly involving the  
88    modulation of immune system (Rancès et al. 2012) and metabolite pathways (i.e. intracellular  
89    cholesterol) (Caragata et al. 2014; Geoghegan et al. 2017). *Wolbachia*-harboring *Ae. aegypti*  
90    lines have shown refractoriness to infection by DENV, ZIKV, CHIKV and other medically  
91    relevant arboviruses (Moreira et al. 2009; Ferguson et al. 2015; Dutra et al. 2016; Aliota,  
92    Peinado, et al. 2016; Aliota, Walker, et al. 2016; Pereira et al. 2018; Carrington et al. 2018;  
93    Flores et al. 2020). Levels of refractoriness, nonetheless, seem to vary between strains, with a  
94    putative tradeoff with fitness costs (Joubert et al. 2016).

95           Supported by promising experimental data, *wMel*-infected *Ae. aegypti* were used in  
96    pioneer field release trials in Northern Australia, promoting the bacterium spread and  
97    establishment into natural mosquito populations (A. A. Hoffmann et al. 2011; Ary A.  
98    Hoffmann et al. 2014). Importantly, *Wolbachia*'s high prevalence rates in the field, as well as  
99    intrinsic CI and PI, were sustained in the long-term, providing the necessary conditions to  
100    reduce dengue incidence in subsequent epidemiological assessments (O'Neill et al. 2019;  
101    Ryan et al. 2019). Corroborating the Australian findings, recent trials in Indonesia  
102    (Tantowijoyo et al. 2020) and Southeastern Brazil (Garcia et al. 2019; Gesto et al. 2020) have  
103    also reported the successful invasion and establishment of *wMel* at some localities, with

104 preliminary evidence of arboviral disease reduction (Indriani et al. 2020; Durovni et al. 2020;  
105 Pinto et al. 2021). In the particular context of Southeastern Brazil, trials have initially targeted  
106 small neighborhoods of Rio de Janeiro and the nearby city Niterói, following adult (Garcia et  
107 al. 2019) or egg deployment methods (Gesto et al. 2020). With high *w*Mel frequencies, and  
108 DENV and ZIKV refractoriness maintained intact over the post-release period (Gesto et al.  
109 2020), additional areas of both cities could be considered for *Wolbachia* implementation.

110 In this study, we report the results of a large-scale field release of *w*Mel-infected *Ae.*  
111 *aegypti* in Rio de Janeiro, covering all the populated area of Ilha do Governador. We analyze  
112 the *Wolbachia* introgression profile, both from an overall and a more detailed neighborhood-  
113 specific perspective. To control for known operational risks we assess the *knockdown*  
114 *resistance* (*kdr*) profiling of colony and field specimens during our intervention. Lastly, we  
115 compare the outcomes of different adult deployment methods, ‘vehicle’ or ‘backpack’, and  
116 relate them to different urban and social contexts.

117

118

## 119 **Results and discussion**

120 To evaluate the performance of a large-scale field deployment of *Wolbachia* in Brazil, we  
121 targeted the whole urban territory of Ilha do Governador, Rio de Janeiro. Being the largest  
122 island of Guanabara bay, with an estimated population of 211,018 and a total area of 40 km<sup>2</sup>,  
123 Ilha do Governador was an ideal starting point for testing expanded deployment interventions.  
124 First, because one of its neighborhoods, Tubiacanga, hosted a successful small trial in recent  
125 years (Garcia et al. 2019). And second, because islands are less prone to migration of wild  
126 mosquitoes from adjacent areas, which could affect the invasion dynamics. For logistical  
127 reasons, Ilha do Governador was divided into two great intervention areas, RJ1 and RJ2, each  
128 comprising a subset of neighborhoods (Figure 1). An additional layer was added by allocating

129 sections to different deployment strategies: vehicle (V) or backpack-assisted (B). The former  
130 was the preferred choice, delivering speed and coverage, but was limited to areas with proper  
131 road organization, in which minivans could circulate and reach release sites. The latter was  
132 chosen for community settlements with informal housing and narrow passages, usually  
133 associated with favelas (i.e. slums). In this case, release sites could only be reached on foot.

134 *wMel*-infected *Ae. aegypti* (*wMel*Rio) (Garcia et al. 2019) were mass-released across  
135 RJ1 and RJ2, following specific schedules for each area (Figure 2, Figure S1, Supplementary  
136 Table S1). Mosquito deployments were carried in three rounds with ‘resting’ periods in-  
137 between, from August 2017 to March 2019 in RJ1, and from November 2017 to March 2019  
138 in RJ2. To monitor *Wolbachia* presence in the field, BG-Sentinel traps were mounted in  
139 suitable households (Figure S2, Supplementary Table S2) and adult *Ae. aegypti* caught were  
140 tested weekly/fortnightly for *wMel* infection. By analyzing the frequency of positive  
141 individuals (i.e. prevalence rates) over the 131 weeks spanning the entire release and post-  
142 release phases, the introgression of *wMel* in RJ1 and RJ2, and across Ilha do Governador as a  
143 whole, were analysed (Figure 2).

144 *wMel* introgression in RJ1 was characterized by a steep increase in prevalence rates  
145 over the first two release rounds, peaking at 60-80%, and a subsequent and self-sustaining  
146 frequency of 50-70%, until the end of monitoring (Figure 2A). At the neighborhood level  
147 (Figure 3) *wMel* introgression was heterogenous in RJ1, suggesting that invasion dynamics  
148 were not consistent across the intervention area. In some of the neighborhoods where releases  
149 were vehicle-assisted, such as Bancários, Freguesia, Monero, Tauá, Cacuia and Praia da  
150 Bandeira the introgression profiles showed consistent increases in *wMel* prevalence over time,  
151 resulting in high prevalence rates (>80%) by March 2020. Others, such as Pitangueiras,  
152 Cocotá and Ribeira, had more heterogenous profiles, with alternating mid-high (60-80%) and  
153 low (<50%) *wMel* frequencies over time, with non-consistent trends by the end of March

154 2020. The neighborhood of Zumbi reached moderately high *w*Mel prevalence (60-70%)  
155 following the second round of releases, but monitoring was then suspended in March 2019  
156 due to very low mosquito abundance, precluding further observation. The areas with  
157 backpack-assisted releases, aggregated and analyzed as a single unit named RJ1.B, showed a  
158 slow and consistent rise in *w*Mel prevalence towards high levels (>80%), suggesting  
159 successful *w*Mel introgression (Figure 3).

160 In RJ2, the overall introgression profile was characterized by oscillating *w*Mel  
161 frequencies (30-60%), with prevalence rates increasing over the second and third release  
162 rounds but not self-sustaining afterwards (Figure 2B). Once again, individual neighborhood  
163 results indicate a complex, spatially variable picture of *w*Mel introgression (Figure 3). Here,  
164 in vehicle-assisted release areas, Jardim Guanabara was the best performing, with a classical  
165 invasion trend stabilizing at high prevalence rates (~80%). Jardim Carioca and Portuguesa, on  
166 the other hand, were less successful and had persistently low frequencies (30-40%). Unlike  
167 the two categories above, Galeão and Cidade Universitária had mid-level *w*Mel frequencies  
168 (30-60%), similar to the overall RJ2 profile. These two neighborhoods account for most of the  
169 territory enclosed in RJ2, with sparse building blocks and a peculiar, mostly non-resident  
170 human occupation. Galeão hosts the city's international airport, and Cidade Universitária, as  
171 the name suggests, hosts the federal university campus. In backpack-assisted release areas,  
172 RJ2.B, prevalence rates also increased during second and third release rounds, but soon after  
173 declined to low levels and, at the time of last monitoring in March 2020, did not yet  
174 demonstrate evidence of *w*Mel introgression.

175 Despite intrinsic differences in their overall profiles, RJ1 and RJ2 are still weakly  
176 associated in Spearman's correlation analysis ( $r = 0.2849$ ,  $P = 0.0236$ ) (Figure 4A),  
177 suggesting that factors underlying invasion are shared at some level between intervention  
178 areas. Hence, RJ1 and RJ2 data were aggregated into a single profile reflecting the overall

179 panorama of *Wolbachia*'s invasion in Ilha do Governador (Figure 2C). With prevalence rates  
180 ranging from 55 to 65% by the end of field monitoring, this panorama suggests that *wMel*  
181 introgression is still an on-going process in Ilha do Governador. This representation, however,  
182 must be understood as an oversimplified indicative of its invasion dynamics, hiding an  
183 underlying complexity at the neighborhood (or neighborhood section) level.

184 A similar analysis was undertaken to compare vehicle and backpack-assisted sections,  
185 within RJ1 (Figure 4B) and RJ2 contexts (Figure 4C). Spearman's correlation indicates a  
186 moderate association between RJ1.V and RJ1.B ( $r = 0.4676$ ,  $P < 0.0001$ ), and a strong  
187 association between RJ2.V and RJ2.B ( $r = 0.6263$ ,  $P < 0.0001$ ), suggesting that the outcomes  
188 of both deployment strategies covary within the same region. Nonetheless, the efficiency of  
189 each strategy, which ultimately translates to weekly prevalence rates and invasion trends, was  
190 variable between intervention areas and possibly affected by non-controlled events. In  
191 backpack-assisted sections, RJ1.B and RJ2.B, release intervention was often impaired by  
192 violent drug-related conflicts. During the third round, RJ1.B had 5 weeks of interruption due  
193 to this reason alone, and RJ2.B had 6, extending the release period to 17 or 28 weeks,  
194 respectively (Supplementary Table S1). Interestingly, should interruptions of this kind  
195 influence invasion dynamics, then RJ2.B was certainly more affected, as revealed by our  
196 failed attempt to stably introgress *wMel* by the end of this study period (i.e. week 131).

197 We previously deployed *wMel* in the small community of Tubiacanga on the Ilha do  
198 Governador along 2014 and 2015. Here, *wMel* initially failed to establish because of  
199 mismatched genetic backgrounds between the release mosquito strain and the resident wild-  
200 type population, raising particular attention to insecticide resistance-related traits (Garcia et al.  
201 2019). It was only after repetitive rounds of backcrossing, with introgression of wild allelic  
202 variants, that the *wMel*-infected line was enough fit to promote a successful invasion. With  
203 this in mind, we monitored the genetics of pyrethroid resistance by screening for mutations in



204 the voltage-gated sodium channel ( $Na_v$ ), known as *kdr* (knockdown resistance), in field caught  
205 *Wolbachia*<sup>+</sup> samples from RJ1 and RJ2 (Figure 5). As we could observe, the allelic profiling  
206 of samples from both intervention areas revealed the predominance of resistant variants,  
207  $Na_vR1(1016Val^+, 1534Cys^{kdr})$  and  $Na_vR2(1016Ile^{kdr}, 1534Cys^{kdr})$ , and shortage of the  
208 susceptible one,  $Na_vS(1016Val^+, 1534Phe^+)$ , corroborating the findings of a nation-wide  
209 survey (Melo Costa et al. 2020). Over the monitoring period, this profile experienced little  
210 variation within and between areas, indicating the long-term maintenance of *kdr* mutations in  
211 *wMel*-infected field samples, and highlighting its adaptive role in pyrethroid-infested  
212 environments. Moreover, it rules out the possibility that the differences observed in invasion  
213 trends along this trial could be influenced by *kdr* frequencies.

214 To drive a successful invasion, *Wolbachia* must interact with bacterium-free *Ae.*  
215 *aegypti* populations and underlying factors that influence its maintenance and density in the  
216 natural habitat (Hancock et al. 2016; Schmidt et al. 2017). Here, especial attention should be  
217 given to quiescent egg loads, which are known to remain viable for many months (up to over  
218 a year) in the habitat, waiting for favorable conditions to resume. With a reduced resistance to  
219 desiccation, *wMel*-infected eggs are critically impacted by climate and have a significant  
220 decay in viability in periods over 40 days (Farnesi et al. 2019). Although it is not clear how  
221 much it costs to invasion profiles, it is still an underlying factor to consider when analyzing  
222 different contexts. From this perspective, human settlements with fewer inhabitants and/or  
223 better management of breeding sites, aided by community participation in vector control  
224 surveillance, could be prone to lower *Ae. aegypti* densities and faster, more efficient,  
225 *Wolbachia* invasion. In contrast, crowded human settlements and undermined control of  
226 breeding sites tend to promote higher *Ae. aegypti* densities and slower, less efficient, invasion  
227 dynamics.

228           Even though some individual neighborhoods of Ilha do Governador failed to elicit  
229 invasion trends, it is possible that this scenario reverts on its own in the future. Here,  
230 migration from adjacent neighborhoods (Schmidt et al. 2017), with higher prevalence rates,  
231 may play an important contribution and act synergistically with *wMel* self-driving ability, as  
232 expressed by the CI mechanism. In other words, *Wolbachia* hotspots like Bancários,  
233 Freguesia, Monero, Praia da Bandeira, Jardim Guanabara and Tubiacanga could serve as  
234 autonomous centers to deliver migrants to less prevalent neighborhoods, helping them to  
235 achieve high and sustainable rates in the future, and providing a more uniform establishment  
236 into Ilha do Governador. This effect, however, can only be verified after a continued long-  
237 term monitoring of field populations, whose data may also indicate the necessity to apply  
238 topic release boosts at those neighborhoods with persistent low rates. These considerations are  
239 part of challenging large-scale release interventions, which are still incipient here in Brazil  
240 and in other parts of the world (Schmidt et al. 2017; Ryan et al. 2019; Tantowijoyo et al.  
241 2020). As a result of accumulating data from current trials, we shall better understand the  
242 factors underlying invasion dynamics and optimize future strategies.

243           Altogether, our results ratify that *wMel* field release is adaptable to large-scale, using  
244 coordinated efforts to impact densely populated areas. With continuous improvement of  
245 rearing and release technology, it could be amplified to cover city-wide territories in short  
246 time. As preliminary disease impact studies suggest (Durovni et al. 2020; Pinto et al. 2021),  
247 one could foresee a significant reduction in the incidence of dengue and other arboviral  
248 diseases in Rio de Janeiro and nearby Niteroi, fulfilling the main goal of current trials and  
249 cementing *Wolbachia* as an efficient and sustainable solution vector control in Brazil.

250

## 251 **Methods**

### 252 **Mosquito husbandry**

253 To generate wMelRio, a precursor Australian line harboring the wMel strain of *Wolbachia*  
254 (Walker et al. 2011) was backcrossed for eight generations to a natural *Ae. aegypti* population  
255 from Rio de Janeiro (Dutra et al. 2015). To achieve high genetic background homogenization,  
256 additional crosses followed by *knockdown resistance* (*kdr*) screening were performed, and  
257 individuals whose *kdr* profiling resembled that of the natural population were positively  
258 selected (Garcia et al. 2019). To prevent drift and selection of new variants in our facilities,  
259 and keep wMelRio in resonance with the natural background, our colony was refreshed every  
260 five generations with 10% wild-caught males.

261 wMelRio eggs were hatched in degasified water with 0.08% Tetramin<sup>®</sup> (Tetra GmbH,  
262 Herrenteich, Germany). After 5 h incubation at room temperature, hatching rates were  
263 calculated and first instar (L1) larvae were transferred to mass-rearing trays containing 20-30k  
264 individuals each. Larval development (L1 to L4) was promoted at 28 °C, in dechlorinated  
265 water supplemented with liquid diet (3.7% fish meal, 2.6% liver powder and 1.1% brewer's  
266 yeast). On the sixth day, with pupae formation reaching levels up to 50-70%, immatures were  
267 collected and sent to either colony renewal or mass-release pipelines (see details for the latter  
268 in 'Adult releases').

269 For colony renewal, immatures were split in groups of approximately 2,000  
270 individuals and placed inside BugDorm<sup>®</sup> cages (MegaView Science Co Ltd, Taiwan). Adult  
271 emergence and husbandry occurred at 25 °C, with 10% sucrose solution *ad libitum*. Females  
272 were fed human blood (from donation centers; more details in 'ethical regulations') every 2-3  
273 days, through Hemotek<sup>®</sup> artificial feeders (Hemotek Ltd, UK). Here, biosafety and ethical  
274 guidelines were followed to prevent arboviral contamination of our colony and mass-release  
275 batches, with all blood samples negatively scored for DENV, ZIKV, CHIKV, MAYV and

276 YFV by multiplex qPCR (Dutra et al. 2016; Pereira et al. 2018). For egg-collection,  
277 dampened filter papers (i.e. half-immersed in water) were placed inside the cages for 2-3  
278 days, before being removed and gradually dried at room temperature. Egg strips (a.k.a.  
279 ovistrips) were stored at room temperature until further use, either for colony maintenance or  
280 field release. Egg strips stored for more than 40 days were discarded due to a decay in overall  
281 quality (Farnesi et al. 2019).

282

### 283 **Adult releases**

284 For the mass-release of *Wolbachia*-harboring *Ae. aegypti*, batches of approximately 150 late-  
285 stage immatures were transferred to release tubes: custom-made acrylic pipes closed at both  
286 ends with a fine mesh, allowing both liquid and air flow during the final developmental  
287 stages. Following adult emergence, release tubes were counted, quality assessed and  
288 designated to ‘backpack’ or ‘vehicle’ deployment.

289 For ‘vehicle’ deployment, release tubes were stacked into mini vans at dawn before  
290 departing to trips covering a fraction of the release sites in Ilha do Governador. Each van  
291 followed a strict routine, leaving the mass-production facility at scheduled times, and with the  
292 driver and the release agent fully aware of the map, traffic and possible turnarounds. When  
293 the van hit the approximate location of the sites, the agent would extend his/her arms outside  
294 the window and gently remove the mesh to free the adults kept inside the tube. Once  
295 completed, the van would proceed to the following site to repeat the procedure.

296 For ‘backpack’ deployment, release tubes were stacked inside backpacks before  
297 departing to areas with restricted access, either because of irregular housing and narrow  
298 alleys, or because of drug-related episodes of violence. In these areas, deployment was carried  
299 out on foot by public health agents, working in partnership with both the WMP staff and  
300 community leaders. As usual, before starting a trip, agents were given maps and routes to

301 cover the release sites, and asked to report their activity and any obstacle that might arise by  
302 the end of the day.

303 The number and spatial distribution of release sites (Figure S1, Supplementary Table  
304 S1) was strategically defined so as promote an efficient spread of *w*Mel-harboring individuals  
305 into each neighborhood. Release sites were geotagged and integrated to ©OpenStreetMap  
306 source data with ArcGIS version 10.4 (Esri, Redlands, CA, USA), allowing the planning of  
307 daily routes and a better control and management over the whole release intervention.  
308 Schedules (Supplementary Table S1) varied according to the area, RJ1 or RJ2, and  
309 deployment method, ‘vehicle’ or ‘backpack’, being revisited after each round based on the  
310 status of *Wolbachia* frequency in the field. Additional rounds were applied in order boost the  
311 frequency levels and promote an efficient invasion.

312

### 313 **Ethical regulations**

314 Regulatory approval for the field release of *Wolbachia*-harboring *Ae. aegypti* was obtained  
315 from the National Research Ethics Committee (CONEP, CAAE 02524513.0.1001.0008),  
316 following a common agreement of governmental agencies (IBAMA, Ministry of  
317 Environment; ANVISA, Ministry of Health; and MAPA, Ministry of Agriculture, Livestock  
318 and Supply) and the former sanction of the special temporary registry (RET,  
319 25351.392108/2013-96). Community acceptance was evaluated by social engagement  
320 activities and a fill out questionnaire, with all neighborhoods recording > 70% household  
321 support. Written informed consents were acquired from those hosting BG-sentinel traps, who  
322 were offered financial aids to cover electricity costs.

323 Additional regulatory approval (CONEP, CAAE 59175616.2.0000.0008) was required  
324 to feed the adult female mosquitoes with human blood, a necessary step for the maintenance  
325 of *w*MelRio colony and mass production of eggs. We only used blood which would have been

326 discarded by not attending quality assurance policies (e.g. blood bags with insufficient  
327 volume) of donation centers: Hospital Pedro Ernesto (Universidade Estadual do Rio de  
328 Janeiro) and Hospital Antonio Pedro (Universidade Federal Fluminense). All blood samples  
329 complied with Brazilian Government guidelines for routine screening, having no information  
330 on donor's identity, sex, age and any clinical condition, as well as testing negative for  
331 Hepatitis B, Hepatitis C, Chagas disease, syphilis, HIV and HTLV.

332

### 333 **Field population monitoring and *Wolbachia* diagnosis**

334 BG-Sentinel traps (Biogents AG, Regensburg, Germany) were spread across all  
335 neighborhoods of Ilha do Governador (RJ) to monitor the *Wolbachia* frequency in the field  
336 (Supplementary Figure S2, Supplementary Table S2). Monitoring sites covered an area of  
337 approximately 250 m<sup>2</sup> each, and were selected among suitable households who formally  
338 accepted hosting a trap. For an optimal control over the monitoring area and map creation,  
339 sites were geotagged and overlaid with ©OpenStreetMap source data using ArcGIS version  
340 10.4 (Esri, Redlands, CA, USA). Overtime, reallocation of sites was often necessary and  
341 occurred when households quit hosting the trap, or in cases of equipment misuse or failure.  
342 Staff agents checked each working trap weekly, bringing the catch bags (perforated envelopes  
343 positioned inside the BG-Sentinels to trap insects) to our facilities for species identification  
344 and *Wolbachia* screening.

345 *Ae. aegypti* samples were individually screened for *Wolbachia* by qPCR or LAMP. In  
346 short, whole-bodies were homogenized in Squash Buffer (10 mM Tris-Cl, 1 mM EDTA, 25  
347 mM NaCl, pH 8.2) supplemented with Proteinase K (250 ug/ml). DNA extraction was carried  
348 out by incubating the homogenates at 56 °C for 5 min, followed by 98 °C for 15 min to stop  
349 the proteinase activity. qPCR reactions were performed with LightCycler® 480 Probes  
350 Master (Roche), using specific primers and probes to amplify *Wolbachia pipientis* WD0513

351 and *Ae. aegypti rps17* genes (Supplementary Table S3). Temperature cycling conditions were  
352 set on a LightCycler® 480 Instrument II (Roche), using the following parameters: 95 °C for  
353 10 min (initial denaturation), and 40 cycles of 95 °C for 15 s and 60 °C for 30 s (single  
354 acquisition). LAMP (*Loop-Mediated Isothermal Amplification*) reactions were performed  
355 with WarmStart® Colorimetric LAMP 2X Master Mix (DNA & RNA) (New England  
356 Biolabs) and an alternative set of primers (Supplementary Table S3), as described elsewhere  
357 (Gonçalves et al. 2019). Isothermal amplification was carried out at 65 °C for 30 min on a T-  
358 100 Thermocycler (Bio-Rad), according with manufacturer conditions. Both qPCR and  
359 LAMP reactions were performed in 96-well plates. Specimens with and without *Wolbachia*  
360 were used as positive and negative controls, respectively.

361

### 362 ***kdr* genotyping**

363 Adult *Ae. aegypti* were genotyped by qPCR to detect single nucleotide polymorphisms  
364 (SNPs) at the 1016 (Val<sup>+</sup> or Ile<sup>kdr</sup>) and 1534 (Phe<sup>+</sup> or Cys<sup>kdr</sup>) positions of the voltage gated  
365 sodium channel gene (*Nav*), as previously reported (Macoris et al. 2018; Hayd et al. 2020).  
366 Amplification reaction was performed with LightCycler 480 Probes Master mix (Roche),  
367 10ng of individual genomic DNA, and a set of primers and probes to detect *kdr* alleles  
368 (Supplementary Table S3) customized by Thermo Fisher Inc. under ID codes: AHS1DL6  
369 (Val<sup>+</sup>1016Ile<sup>kdr</sup>) and AHUADFA (Phe<sup>+</sup>1534Cys<sup>kdr</sup>). Thermal cycling was carried out on a Light  
370 Cycler 480 Instrument II (Roche), set to the following conditions: 95 °C for 10 min (initial  
371 denaturation), and *N* cycles of 95 °C for 15 s and 60 °C for 30 s (single acquisition). *N* was set  
372 to 30, for amplifying Val<sup>+</sup>1016Ile<sup>kdr</sup>, or to 40, for Phe<sup>+</sup>1534Cys<sup>kdr</sup>. For each collection date, 30  
373 samples were individually genotyped. Rockefeller colony specimens (kindly provided by Dr.  
374 Ademir de Jesus Martins Júnior, IOC, Fiocruz), harboring susceptible (*NavS*) or resistant  
375 variants (*NavR1* and *NavR2*), were used as positive controls.

## 376 **Statistical Analyses**

377 All statistical analyzes were performed in Graphpad Prism 8 (Graphpad Software, Inc).

378 *Wolbachia* frequency time-series were smoothed using a moving average of 7-neighbors, 2<sup>nd</sup>  
379 order polynomials. Spearman correlation  $r$  coefficient was used to compare invasion trends  
380 between great intervention areas, RJ1 and RJ2, as well as the deployment strategies applied  
381 within each, ‘vehicle’ or ‘backpack’. For all statistical inferences,  $\alpha$  was set to 0.05.

382

383

## 384 **Data Availability**

385 All relevant data generated or analyzed during this study are included in this manuscript (and  
386 its Supplementary Information file).

387

## 388 **Acknowledgements**

389 We acknowledge all team members of the World Mosquito Program, past and present, who  
390 were involved and genuinely believed in the *Wolbachia* method as solution to attenuate the  
391 burden of arboviral diseases in densely populated areas of Rio de Janeiro. The successful  
392 outcome of this study, as well as its future legacy, was only achieved because of their  
393 dedication and team-working. We thank Flavia Teixeira, for managing ethical and regulatory  
394 approvals and compliance, and Roberto Peres and Catia Cabral, for supervising the mass-  
395 rearing, field release and *Wolbachia* monitoring. Special thanks to WMP Global for overall  
396 advice and tech transfer underlying large-scale deployment. We are also very grateful to the  
397 public agents of the Health Municipality of Rio de Janeiro, for the providing essential field  
398 assistance, and to community members of Ilha do Governador, for actively supporting and  
399 engaging in our activities.



## 400 **References**

401

402 Abdelnabi, Rana, Johan Neyts, and Leen Delang. 2015. 'Towards Antivirals against

403 Chikungunya Virus'. *Antiviral Research* 121 (September): 59–68.

404 <https://doi.org/10.1016/j.antiviral.2015.06.017>.

405 Aliota, Matthew T., Stephen A. Peinado, Ivan Dario Velez, and Jorge E. Osorio. 2016. 'The

406 WMel Strain of Wolbachia Reduces Transmission of Zika Virus by Aedes Aegypti'.

407 *Scientific Reports* 6: 28792. <https://doi.org/10.1038/srep28792>.

408 Aliota, Matthew T., Emma C. Walker, Alexander Uribe Yepes, Ivan Dario Velez, Bruce M.

409 Christensen, and Jorge E. Osorio. 2016. 'The WMel Strain of Wolbachia Reduces

410 Transmission of Chikungunya Virus in Aedes Aegypti'. *PLoS Neglected Tropical*

411 *Diseases* 10 (4): e0004677. <https://doi.org/10.1371/journal.pntd.0004677>.

412 Bhatt, Samir, Peter W. Gething, Oliver J. Brady, Jane P. Messina, Andrew W. Farlow,

413 Catherine L. Moyes, John M. Drake, et al. 2013. 'The Global Distribution and Burden of

414 Dengue'. *Nature* 496 (7446): 504–7. <https://doi.org/10.1038/nature12060>.

415 Brady, Oliver J., Peter W. Gething, Samir Bhatt, Jane P. Messina, John S. Brownstein, Anne

416 G. Hoen, Catherine L. Moyes, Andrew W. Farlow, Thomas W. Scott, and Simon I. Hay.

417 2012. 'Refining the Global Spatial Limits of Dengue Virus Transmission by Evidence-

418 Based Consensus'. *PLoS Neglected Tropical Diseases* 6 (8): e1760.

419 <https://doi.org/10.1371/journal.pntd.0001760>.

420 Caragata, Eric P., Edwige Rancès, Scott L. O'Neill, and Elizabeth A. McGraw. 2014.

421 'Competition for Amino Acids between Wolbachia and the Mosquito Host, Aedes

422 Aegypti'. *Microbial Ecology* 67 (1): 205–18. <https://doi.org/10.1007/s00248-013-0339-4>.

423 Carrington, Lauren B., Bich Chau Nguyen Tran, Nhat Thanh Hoang Le, Tai Thi Hue Luong,

424 Truong Thanh Nguyen, Phong Thanh Nguyen, Chau Van Vinh Nguyen, et al. 2018.

- 425 'Field- and Clinically Derived Estimates of *Wolbachia*-Mediated Blocking of  
426 Dengue Virus Transmission Potential in *Aedes Aegypti* Mosquitoes'.  
427 *Proceedings of the National Academy of Sciences* 115 (2): 361.  
428 <https://doi.org/10.1073/pnas.1715788115>.
- 429 Carvalho, F. D., and L. A. Moreira. 2017. 'Why Is *Aedes Aegypti* Linnaeus so Successful as a  
430 Species?' *Neotropical Entomology* 46 (3): 243–55. [https://doi.org/10.1007/s13744-017-](https://doi.org/10.1007/s13744-017-0520-4)  
431 0520-4.
- 432 Durovni, B, V Saraceni, A Eppinghaus, TIS Riback, LA Moreira, NP Jewell, SM Dufault, et  
433 al. 2020. 'The Impact of Large-Scale Deployment of *Wolbachia* Mosquitoes on Dengue  
434 and Other *Aedes*-Borne Diseases in Rio de Janeiro and Niterói, Brazil: Study Protocol  
435 for a Controlled Interrupted Time Series Analysis Using Routine Disease Surveillance  
436 Data [Version 2; Peer Review: 2 Approved, 1 Approved with Reservations]'.  
437 *F1000Research* 8 (1328). <https://doi.org/10.12688/f1000research.19859.2>.
- 438 Dutra, Heverton Leandro Carneiro, Lilha Maria Barbosa Dos Santos, Eric Pearce Caragata,  
439 Jéssica Barreto Lopes Silva, Daniel Antunes Maciel Villela, Rafael Maciel-de-Freitas, and  
440 Luciano Andrade Moreira. 2015. 'From Lab to Field: The Influence of Urban Landscapes  
441 on the Invasive Potential of *Wolbachia* in Brazilian *Aedes Aegypti* Mosquitoes'. *PLoS*  
442 *Neglected Tropical Diseases* 9 (4): e0003689.  
443 <https://doi.org/10.1371/journal.pntd.0003689>.
- 444 Dutra, Heverton Leandro Carneiro, Marcele Neves Rocha, Fernando Braga Stehling Dias,  
445 Simone Brutman Mansur, Eric Pearce Caragata, and Luciano Andrade Moreira. 2016.  
446 'Wolbachia Blocks Currently Circulating Zika Virus Isolates in Brazilian *Aedes Aegypti*  
447 Mosquitoes'. *Cell Host & Microbe* 19 (6): 771–74.  
448 <https://doi.org/10.1016/j.chom.2016.04.021>.

- 449 Farnesi, Luana Cristina, Thiago Affonso Belinato, João Silveira Moledo Gesto, Ademir Jesus  
450 Martins, Rafaela Vieira Bruno, and Luciano Andrade Moreira. 2019. 'Embryonic  
451 Development and Egg Viability of WMe1-Infected *Aedes Aegypti*'. *Parasites & Vectors*  
452 12 (1): 211. <https://doi.org/10.1186/s13071-019-3474-z>.
- 453 Ferguson, Neil M., Duong Thi Hue Kien, Hannah Clapham, Ricardo Aguas, Vu Tuan Trung,  
454 Tran Nguyen Bich Chau, Jean Popovici, et al. 2015. 'Modeling the Impact on Virus  
455 Transmission of Wolbachia-Mediated Blocking of Dengue Virus Infection of *Aedes*  
456 *Aegypti*.' *Science Translational Medicine* 7 (279): 279ra37.  
457 <https://doi.org/10.1126/scitranslmed.3010370>.
- 458 Flores, Heather A., Jyotika Taneja de Bruyne, Tanya B. O'Donnell, Vu Tuyet Nhu, Nguyen  
459 Thi Giang, Huynh Thi Xuan Trang, Huynh Thi Thuy Van, et al. 2020. 'Multiple  
460 Wolbachia Strains Provide Comparative Levels of Protection against Dengue Virus  
461 Infection in *Aedes Aegypti*'. *PLOS Pathogens* 16 (4): e1008433.  
462 <https://doi.org/10.1371/journal.ppat.1008433>.
- 463 Garcia, Gabriela de Azambuja, Gabriel Sylvestre, Raquel Aguiar, Guilherme Borges da  
464 Costa, Ademir Jesus Martins, José Bento Pereira Lima, Martha T. Petersen, et al. 2019.  
465 'Matching the Genetics of Released and Local *Aedes Aegypti* Populations Is Critical to  
466 Assure Wolbachia Invasion'. *PLoS Neglected Tropical Diseases* 13 (1): e0007023.  
467 <https://doi.org/10.1371/journal.pntd.0007023>.
- 468 Geoghegan, Vincent, Kirsty Stainton, Stephanie M. Rainey, Thomas H. Ant, Adam A. Dowle,  
469 Tony Larson, Svenja Hester, Philip D. Charles, Benjamin Thomas, and Steven P. Sinkins.  
470 2017. 'Perturbed Cholesterol and Vesicular Trafficking Associated with Dengue Blocking  
471 in Wolbachia-Infected *Aedes Aegypti* Cells'. *Nature Communications* 8 (1): 526.  
472 <https://doi.org/10.1038/s41467-017-00610-8>.

- 473 Gesto, João Silveira Moledo, Gabriel Sylvestre Ribeiro, Marcele Neves Rocha, Fernando  
474 Braga Stehling Dias, Julia Peixoto, Fabiano Duarte Carvalho, Thiago Nunes Pereira, and  
475 Luciano Andrade Moreira. 2020. ‘Reduced Competence to Arboviruses Following the  
476 Sustainable Invasion of *Wolbachia* into Native *Aedes Aegypti*  
477 from Niterói, Southeastern Brazil’. *BioRxiv*, January, 2020.09.25.312207.  
478 <https://doi.org/10.1101/2020.09.25.312207>.
- 479 Gonçalves, Daniela da Silva, David J. Hooker, Yi Dong, Nathan Baran, Peter Kyrylos, Iñaki  
480 Iturbe-Ormaetxe, Cameron P. Simmons, and Scott L. O’Neill. 2019. ‘Detecting WMel  
481 *Wolbachia* in Field-Collected *Aedes Aegypti* Mosquitoes Using Loop-Mediated  
482 Isothermal Amplification (LAMP)’. *Parasites & Vectors* 12 (1): 404.  
483 <https://doi.org/10.1186/s13071-019-3666-6>.
- 484 Hancock, Penelope A., Vanessa L. White, Ashley G. Callahan, Charles H. J. Godfray, Ary A.  
485 Hoffmann, and Scott A. Ritchie. 2016. ‘Density-Dependent Population Dynamics in  
486 *Aedes Aegypti* Slow the Spread of WMel *Wolbachia*’. *Journal of Applied Ecology* 53 (3):  
487 785–93. <https://doi.org/10.1111/1365-2664.12620>.
- 488 Hayd, Ramão Luciano Nogueira, Luana Carrara, Joel de Melo Lima, Nathalia Coelho Vargas  
489 de Almeida, José Bento Pereira Lima, and Ademir Jesus Martins. 2020. ‘Evaluation of  
490 Resistance to Pyrethroid and Organophosphate Adulticides and Kdr Genotyping in *Aedes*  
491 *Aegypti* Populations from Roraima, the Northernmost Brazilian State’. *Parasites &*  
492 *Vectors* 13 (1): 264. <https://doi.org/10.1186/s13071-020-04127-w>.
- 493 Hoffmann, A. A., B. L. Montgomery, J. Popovici, I. Iturbe-Ormaetxe, P. H. Johnson, F.  
494 Muzzi, M. Greenfield, et al. 2011. ‘Successful Establishment of *Wolbachia* in *Aedes*  
495 Populations to Suppress Dengue Transmission’. *Nature* 476 (7361): 454–57.  
496 <https://doi.org/10.1038/nature10356>.

- 497 Hoffmann, Ary A., Inaki Iturbe-Ormaetxe, Ashley G. Callahan, Ben L. Phillips, Katrina  
498 Billington, Jason K. Axford, Brian Montgomery, Andrew P. Turley, and Scott L. O'Neill.  
499 2014. 'Stability of the WMel Wolbachia Infection Following Invasion into *Aedes Aegypti*  
500 Populations'. *PLoS Neglected Tropical Diseases* 8 (9): e3115.  
501 <https://doi.org/10.1371/journal.pntd.0003115>.
- 502 Indriani, C, W Tantowijoyo, E Rancos, B Andari, E Prabowo, D Yusdi, MR Ansari, et al.  
503 2020. 'Reduced Dengue Incidence Following Deployments of Wolbachia-Infected *Aedes*  
504 *Aegypti* in Yogyakarta, Indonesia: A Quasi-Experimental Trial Using Controlled  
505 Interrupted Time Series Analysis [Version 1; Peer Review: 1 Approved]'. *Gates Open*  
506 *Research* 4 (50). <https://doi.org/10.12688/gatesopenres.13122.1>.
- 507 Joubert, D. Albert, Thomas Walker, Lauren B. Carrington, Jyotika Taneja De Bruyne, Duong  
508 Hue T. Kien, Nhat Le Thanh Hoang, Nguyen Van Vinh Chau, Iñaki Iturbe-Ormaetxe,  
509 Cameron P. Simmons, and Scott L. O'Neill. 2016. 'Establishment of a Wolbachia  
510 Superinfection in *Aedes Aegypti* Mosquitoes as a Potential Approach for Future  
511 Resistance Management'. *PLOS Pathogens* 12 (2): e1005434.  
512 <https://doi.org/10.1371/journal.ppat.1005434>.
- 513 Kraemer, Moritz U. G., Marianne E. Sinka, Kirsten A. Duda, Adrian Q. N. Mylne, Freya M.  
514 Shearer, Christopher M. Barker, Chester G. Moore, et al. 2015. 'The Global Distribution  
515 of the Arbovirus Vectors *Aedes Aegypti* and *Ae. Albopictus*'. *ELife* 4 (June): e08347.  
516 <https://doi.org/10.7554/eLife.08347>.
- 517 Lin, Hsiao-Han, Bak-Sau Yip, Li-Min Huang, and Suh-Chin Wu. 2018. 'Zika Virus Structural  
518 Biology and Progress in Vaccine Development'. *Biotechnology Advances* 36 (1): 47–53.  
519 <https://doi.org/10.1016/j.biotechadv.2017.09.004>.
- 520 Maciel-de-Freitas, Rafael, Fernando Campos Avendanho, Rosangela Santos, Gabriel  
521 Sylvestre, Simone Costa Araújo, José Bento Pereira Lima, Ademir Jesus Martins,

- 522 Giovanini Evelim Coelho, and Denise Valle. 2014. ‘Undesirable Consequences of  
523 Insecticide Resistance Following *Aedes Aegypti* Control Activities Due to a Dengue  
524 Outbreak’. *PloS One* 9 (3): e92424. <https://doi.org/10.1371/journal.pone.0092424>.
- 525 Macoris, Maria de Lourdes, Ademir Jesus Martins, Maria Teresa Macoris Andrighetti, José  
526 Bento Pereira Lima, and Denise Valle. 2018. ‘Pyrethroid Resistance Persists after Ten  
527 Years without Usage against *Aedes Aegypti* in Governmental Campaigns: Lessons from  
528 São Paulo State, Brazil’. *PLoS Neglected Tropical Diseases* 12 (3): e0006390–e0006390.  
529 <https://doi.org/10.1371/journal.pntd.0006390>.
- 530 Melo Costa, Monique, Kauara Brito Campos, Luiz Paulo Brito, Emmanuel Roux, Cynara  
531 Melo Rodovalho, Diogo Fernandes Bellinato, José Bento Pereira Lima, and Ademir Jesus  
532 Martins. 2020. ‘Kdr Genotyping in *Aedes Aegypti* from Brazil on a Nation-Wide Scale  
533 from 2017 to 2018’. *Scientific Reports* 10 (1): 13267. [https://doi.org/10.1038/s41598-020-](https://doi.org/10.1038/s41598-020-70029-7)  
534 [70029-7](https://doi.org/10.1038/s41598-020-70029-7).
- 535 Moreira, Luciano A., Iñaki Iturbe-Ormaetxe, Jason A. Jeffery, Guangjin Lu, Alyssa T. Pyke,  
536 Lauren M. Hedges, Bruno C. Rocha, et al. 2009. ‘A *Wolbachia* Symbiont in *Aedes*  
537 *Aegypti* Limits Infection with Dengue, Chikungunya, and Plasmodium’. *Cell* 139 (7):  
538 1268–78. <https://doi.org/10.1016/j.cell.2009.11.042>.
- 539 O’Neill, Scott L, Peter A Ryan, Andrew P Turley, Geoff Wilson, Kate Retzki, Inaki Iturbe-  
540 Ormaetxe, Yi Dong, et al. 2019. ‘Scaled Deployment of *Wolbachia* to Protect the  
541 Community from Dengue and Other *Aedes* Transmitted Arboviruses’. *Gates Open*  
542 *Research* 2 (August): 36–36. <https://doi.org/10.12688/gatesopenres.12844.3>.
- 543 Pereira, Thiago Nunes, Marcele Neves Rocha, Pedro Henrique Ferreira Sucupira, Fabiano  
544 Duarte Carvalho, and Luciano Andrade Moreira. 2018. ‘*Wolbachia* Significantly Impacts  
545 the Vector Competence of *Aedes Aegypti* for Mayaro Virus’. *Scientific Reports* 8 (1):  
546 6889. <https://doi.org/10.1038/s41598-018-25236-8>.

- 547 Pinto, Sofia B., Thais I. S. Riback, Gabriel Sylvestre, Guilherme Costa, Julia Peixoto,  
548 Fernando B. S. Dias, Stephanie K. Tanamas, et al. 2021. ‘Effectiveness of  
549 *Wolbachia*-Infected Mosquito Deployments in Reducing the Incidence of  
550 Dengue and Chikungunya in Niterói, Brazil: A Quasi-Experimental Study’. *MedRxiv*,  
551 January, 2021.01.31.21250726. <https://doi.org/10.1101/2021.01.31.21250726>.
- 552 Rancès, Edwige, Yixin H. Ye, Megan Woolfit, Elizabeth A. McGraw, and Scott L. O’Neill.  
553 2012. ‘The Relative Importance of Innate Immune Priming in *Wolbachia*-Mediated  
554 Dengue Interference’. *PLoS Pathogens* 8 (2): e1002548.  
555 <https://doi.org/10.1371/journal.ppat.1002548>.
- 556 Rezende, Gustavo Lazzaro, Ademir Jesus Martins, Carla Gentile, Luana Cristina Farnesi,  
557 Marcelo Pelajo-Machado, Alexandre Afrânio Peixoto, and Denise Valle. 2008.  
558 ‘Embryonic Desiccation Resistance in *Aedes Aegypti*: Presumptive Role of the Chitinized  
559 Serosal Cuticle’. *BMC Developmental Biology* 8 (September): 82.  
560 <https://doi.org/10.1186/1471-213X-8-82>.
- 561 Ryan, Peter, Andrew Turley, Geoff Wilson, Tim Hurst, Kate Retzki, Jack Brown-Kenyon,  
562 Lauren Hodgson, et al. 2019. ‘Establishment of WMel *Wolbachia* in *Aedes Aegypti*  
563 Mosquitoes and Reduction of Local Dengue Transmission in Cairns and Surrounding  
564 Locations in Northern Queensland, Australia’. *Gates Open Research* 3 (September):  
565 1547. <https://doi.org/10.12688/gatesopenres.13061.1>.
- 566 Schmidt, Tom L., Nicholas H. Barton, Gordana Rašić, Andrew P. Turley, Brian L.  
567 Montgomery, Inaki Iturbe-Ormaetxe, Peter E. Cook, et al. 2017. ‘Local Introduction and  
568 Heterogeneous Spatial Spread of Dengue-Suppressing *Wolbachia* through an Urban  
569 Population of *Aedes Aegypti*.’ *PLoS Biology* 15 (5): e2001894.  
570 <https://doi.org/10.1371/journal.pbio.2001894>.

- 571 SVS. 2019. 'Boletim Epidemiológico 38'. *Secretaria de Vigilância Em Saúde - Ministério Da*  
572 *Saúde* 50 (38).
- 573 ———. 2021. 'Boletim Epidemiológico 03'. *Secretaria de Vigilância Em Saúde - Ministério*  
574 *Da Saúde* 52 (3).
- 575 Tantowijoyo, Warsito, Beki Andari, Eggi Arguni, Nida Budiwati, Indah Nurhayati, Iva  
576 Fitriana, Ingrid Ernesia, et al. 2020. 'Stable Establishment of WMel Wolbachia in Aedes  
577 Aegypti Populations in Yogyakarta, Indonesia'. *PLoS Neglected Tropical Diseases* 14  
578 (4): e0008157–e0008157. <https://doi.org/10.1371/journal.pntd.0008157>.
- 579 Thisyakorn, Usa, and Chule Thisyakorn. 2014. 'Latest Developments and Future Directions  
580 in Dengue Vaccines'. *Therapeutic Advances in Vaccines* 2 (1): 3–9.  
581 <https://doi.org/10.1177/2051013613507862>.
- 582 Valença, M. A., L. S. Marteis, L. M. Steffler, A. M. Silva, and R. L. C. Santos. 2013.  
583 'Dynamics and Characterization of Aedes Aegypti (L.) (Diptera: Culicidae) Key Breeding  
584 Sites'. *Neotropical Entomology* 42 (3): 311–16. [https://doi.org/10.1007/s13744-013-0118-](https://doi.org/10.1007/s13744-013-0118-4)  
585 4.
- 586 Walker, T., P. H. Johnson, L. A. Moreira, I. Iturbe-Ormaetxe, F. D. Frentiu, C. J.  
587 McMeniman, Y. S. Leong, et al. 2011. 'The WMel Wolbachia Strain Blocks Dengue and  
588 Invades Caged Aedes Aegypti Populations'. *Nature* 476 (7361): 450–53.  
589 <https://doi.org/10.1038/nature10355>.
- 590 Werren, John H., Laura Baldo, and Michael E. Clark. 2008. 'Wolbachia: Master Manipulators  
591 of Invertebrate Biology'. *Nature Reviews. Microbiology* 6 (10): 741–51.  
592 <https://doi.org/10.1038/nrmicro1969>.
- 593 WHO. 2017. 'Global Vector Control Response 2017–2030'. *World Health Organization,*  
594 Geneva, .



595 Zug, Roman, and Peter Hammerstein. 2012. 'Still a Host of Hosts for Wolbachia: Analysis of  
596 Recent Data Suggests That 40% of Terrestrial Arthropod Species Are Infected'. *PloS One*  
597 7 (6): e38544. <https://doi.org/10.1371/journal.pone.0038544>.

598

599

## 600 **Funding**

601 This work was funded by the Brazilian Ministry of Health, and a grant to Monash University  
602 from the Bill and Melinda Gates Foundation. The funders had no role in study design, data  
603 collection and analysis, decision to publish, or preparation of the manuscript.

604

605

## 606 **Additional Information**

### 607 **Competing Interests**

608 The authors have declared that no competing interests exist.

609

610

## 611 **Figure Legends**

612 **Figure 1. Map of Ilha do Governador intervention areas and neighborhoods.** Satellite  
613 view of Ilha do Governador area, the largest island of Guanabara bay, in northern Rio de  
614 Janeiro (RJ). With an estimated total population of 211,018 in 40 km<sup>2</sup>, Ilha do Governador is  
615 divided into the following neighborhoods: Bancários, Cacuia, Cocotá, Freguesia, Monero,  
616 Pitangueiras, Praia da Bandeira, Ribeira, Tauá, Zumbi, Cidade Universitária, Galeão, Jardim  
617 Carioca, Jardim Guanabara, and Portuguesa. For *Wolbachia* release intervention,  
618 neighborhoods were grouped into two great areas, RJ1 (green) and RJ2 (yellow). Note that

619 Cidade Universitária is actually located in an adjacent island, Ilha do Fundão, which is under  
620 the same public administration zone of Ilha do Governador and was therefore included as part  
621 of the RJ2 area. Also depicted is Tubiacanga (red), a small neighborhood which was targeted  
622 in a pioneer release trial.

623

624 **Figure 2. *Wolbachia*'s introgression into Ilha do Governador.** Adult *w*Mel-harboring *Ae.*  
625 *aegypti* were mass-released in RJ1 and RJ2 areas, covering the entire territory of Ilha do  
626 Governador (Rio de Janeiro). Release intervention was carried out in three rounds (grey  
627 shading). Invasion profiles are depicted separately for (A) RJ1 and (B) RJ2, plus an aggregate  
628 of both for (C) an overall representation. Following the left Y-axis, *Wolbachia* prevalence  
629 indexes (%) are color coded and plotted as dots plus 2<sup>nd</sup> degree, 7-neighbors, moving averages  
630 (dashed lines). Following the right Y-axis, sample sizes are plotted as histograms (orange  
631 bars). Time (weeks), since the beginning of adult releases (Week 1, August 2017) until recent  
632 days (Week 131, March 2020), is represented in the X-axis. Ticks are scaled for 20-week  
633 bins.

634

635 **Figure 3. *Wolbachia*'s invasion profiles in individual neighborhoods.** Adult *w*Mel-  
636 harboring *Ae. aegypti* were released (grey shading) across all neighborhoods of Ilha do  
637 Governador. Individual invasion profiles are depicted, with 'RJ1' (green) or 'RJ2' (purple)  
638 coding for the intervention area, and 'V' or 'B' for vehicle or backpack-assisted releases,  
639 respectively. *Wolbachia* prevalence indexes (%) are color coded and represented by dots plus  
640 2<sup>nd</sup> degree, 7-neighbors, moving averages (dashed lines), following the left Y-axis. Sample  
641 sizes are plotted as histograms (orange), following the right Y-axis. Prevalence indexes from  
642 small-sized samples (N<5) are marked in red. The X-axis represents time (weeks), since the  
643 beginning of adult releases (Week1, August 2017) until recent days of field monitoring (Week

644 131, March 2020), with ticks scaled accordingly to represent 20-week bins. Post-release  
645 *Wolbachia* prevalence in Tubiacanga (blue), a previous intervention site, is shown as a  
646 standard for long-term field establishment.

647

648 **Figure 4. Comparison of invasion profiles between intervention areas and deployment**  
649 **strategies.** *w*Mel frequencies for different intervention areas, or deployment strategies, were  
650 represented individually and overlaid, and compared by Spearman's correlation analyses. A)  
651 RJ1 vs RJ2; B) RJ1.V vs RJ1.B; C) RJ2.V vs RJ2.B. The degree of association between  
652 frequency datasets is indicated by the *r* coefficient, at the top right of the correlation graphs.

653

654 **Figure 5. Genetic monitoring of insecticide resistance in intervention areas.**

655 Knockdown resistance (*kdr*) allelic variants were monitored in field caught mosquitoes  
656 (*Wolbachia*<sup>+</sup>) over the release and post-release interventions in RJ1 and RJ2. Data represent  
657 the proportion of alleles linked to susceptibility, S, or resistance to insecticides, R1 and R2, in  
658 each sample (n=30). Mosquitoes from Tubicanga, home to a previous successful trial, were  
659 also included for comparison. S (*Na<sub>v</sub>S*): 1016Val<sup>+</sup>; R1 (*Na<sub>v</sub>RI*): 1016Val<sup>+</sup>, 1534Cys<sup>kdr</sup>; R2  
660 (*Na<sub>v</sub>R2*): 1016Ile<sup>kdr</sup>, 1534Cys<sup>kdr</sup>.

661

662

663

664

665

666

667

668

669 **Figure 1**

670

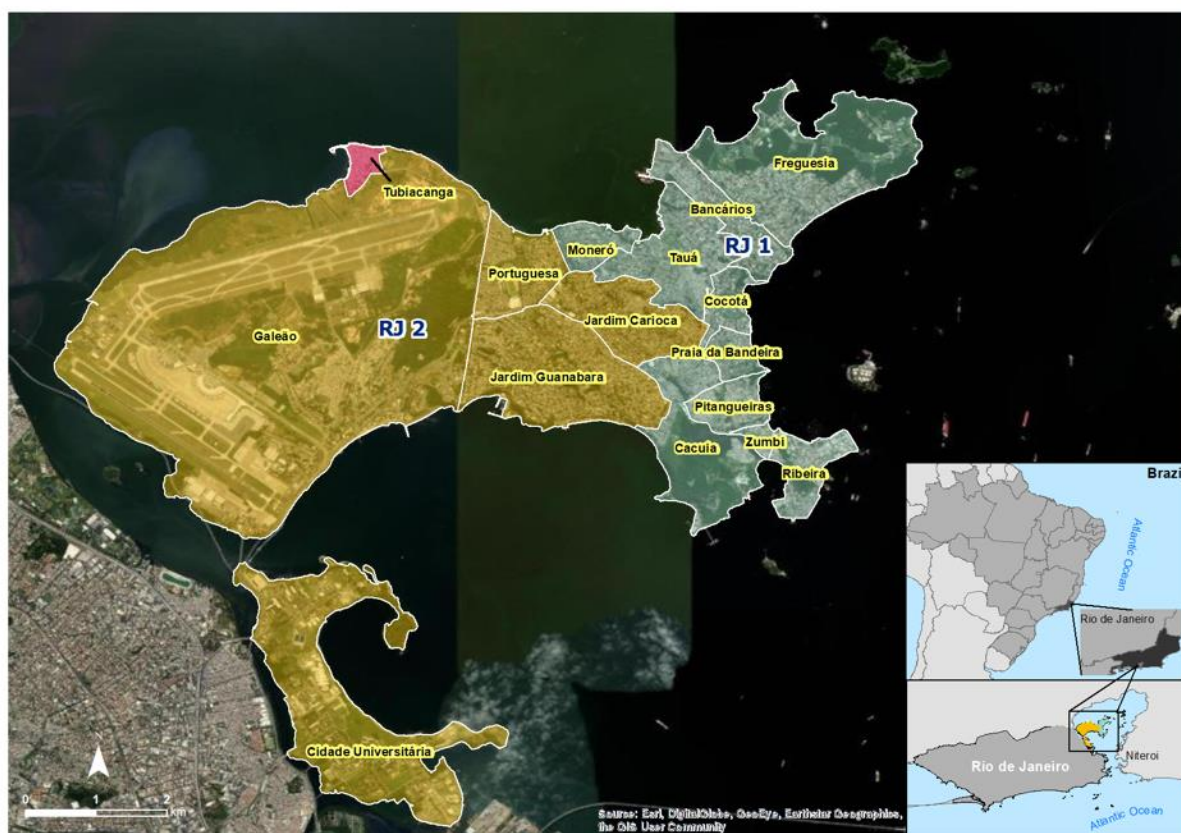

671

672

673

674

675

676

677

678

679

680

681

682

683 **Figure 2**

684

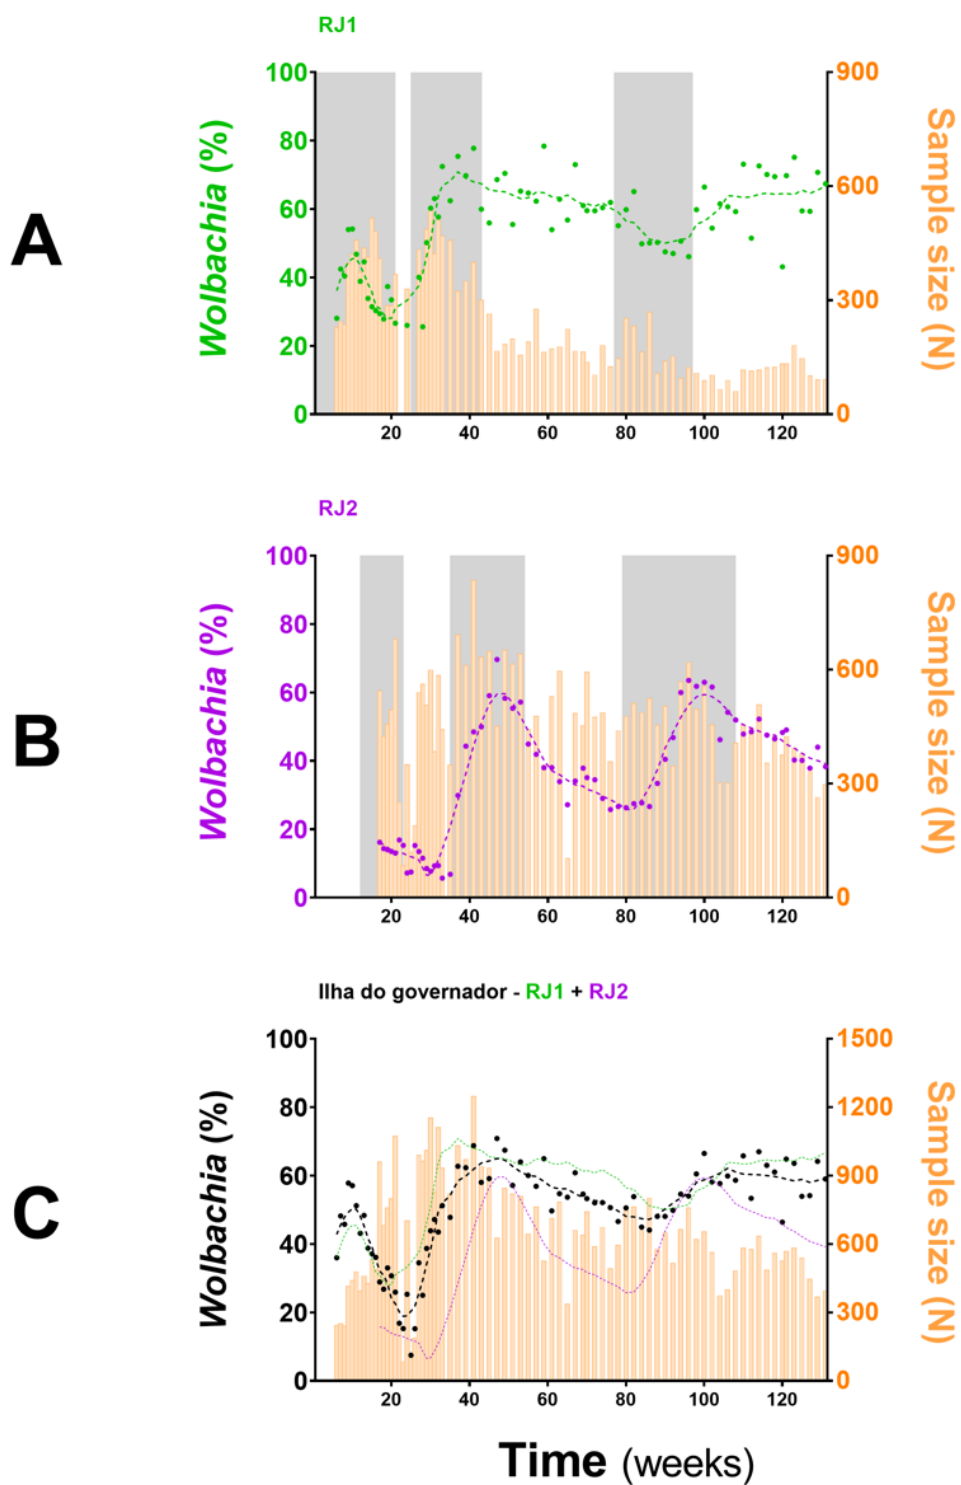

685

686

687

688 **Figure 3**

689

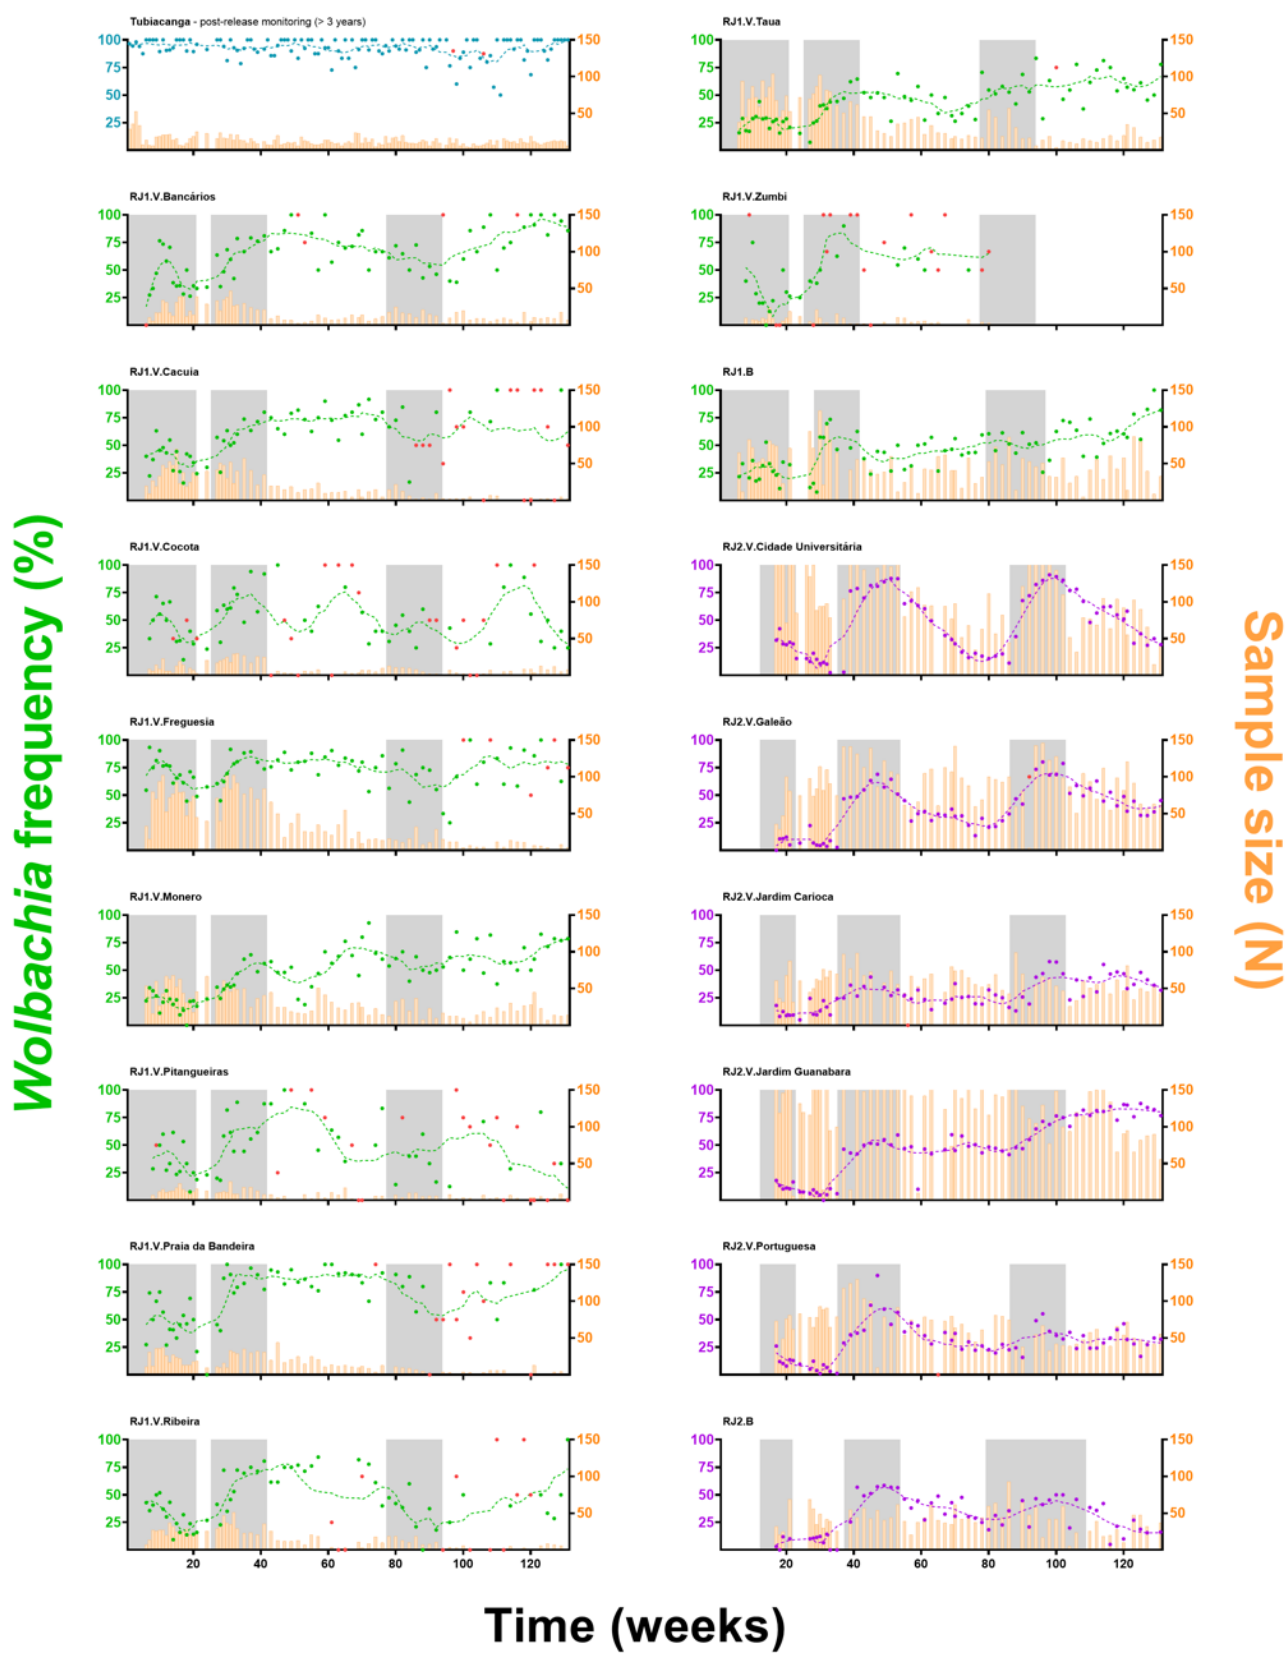

690

691 **Figure 4**

692

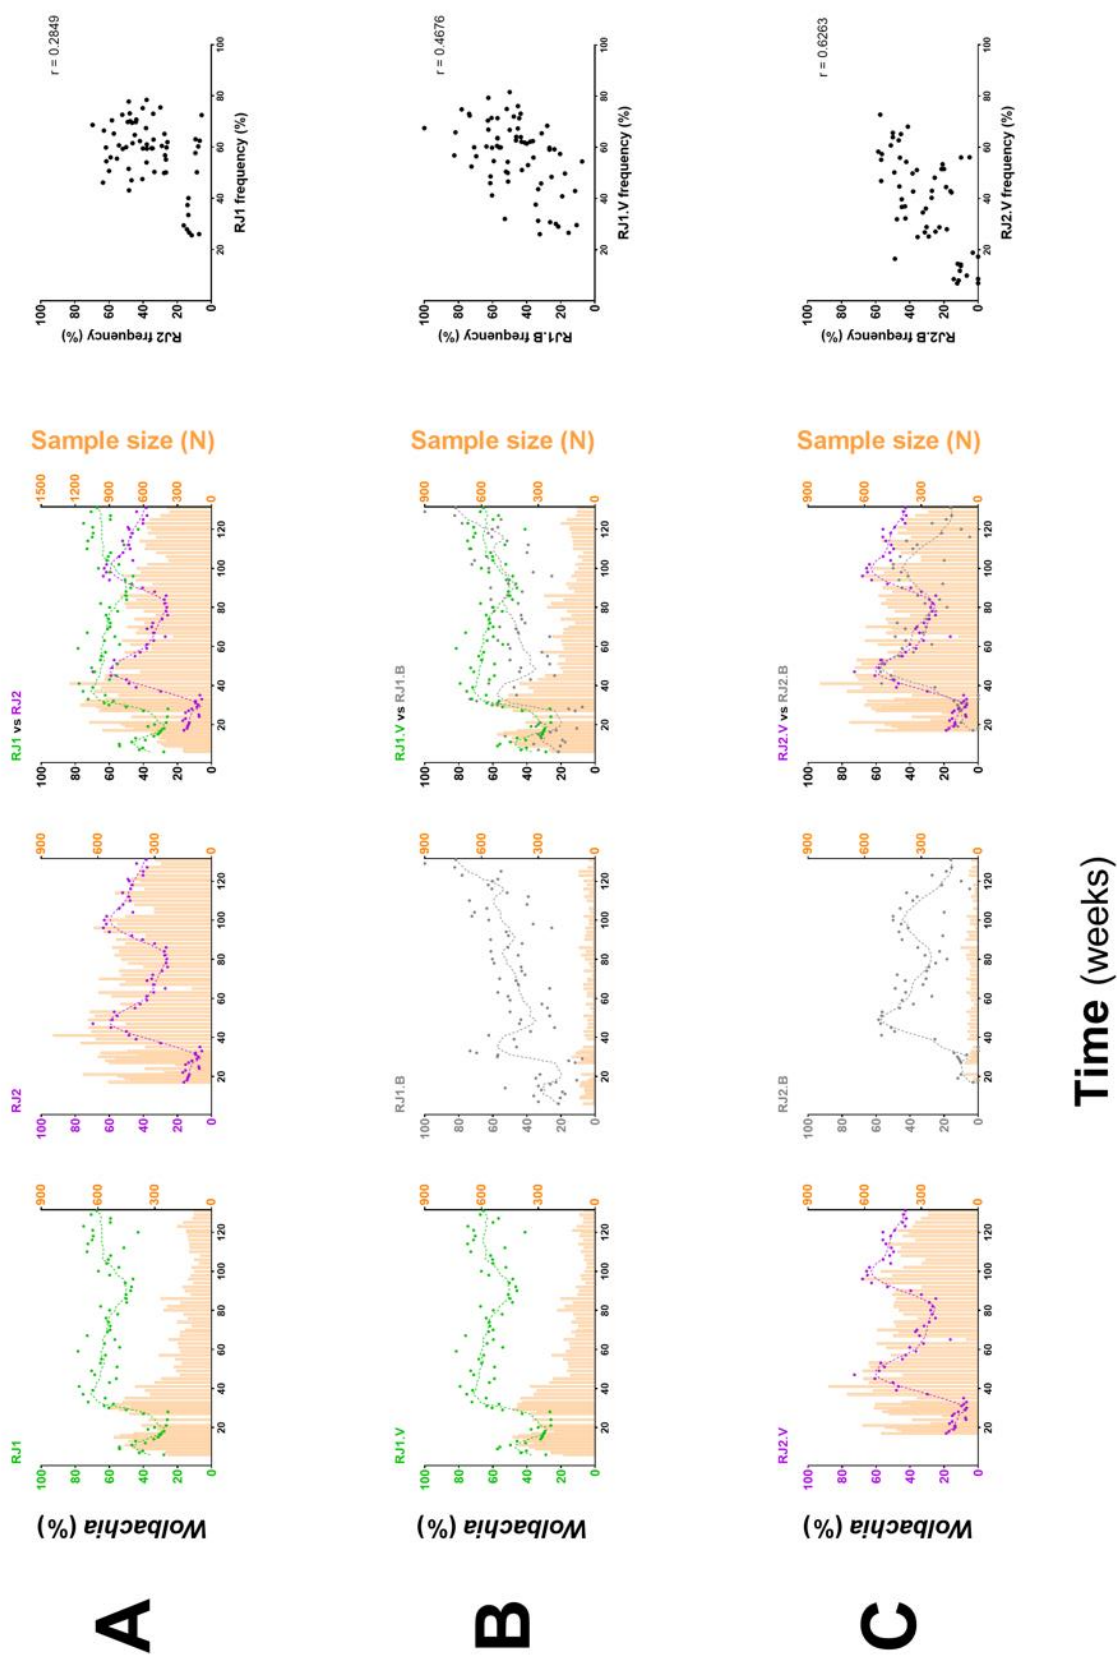

693

694 **Figure 5**

695

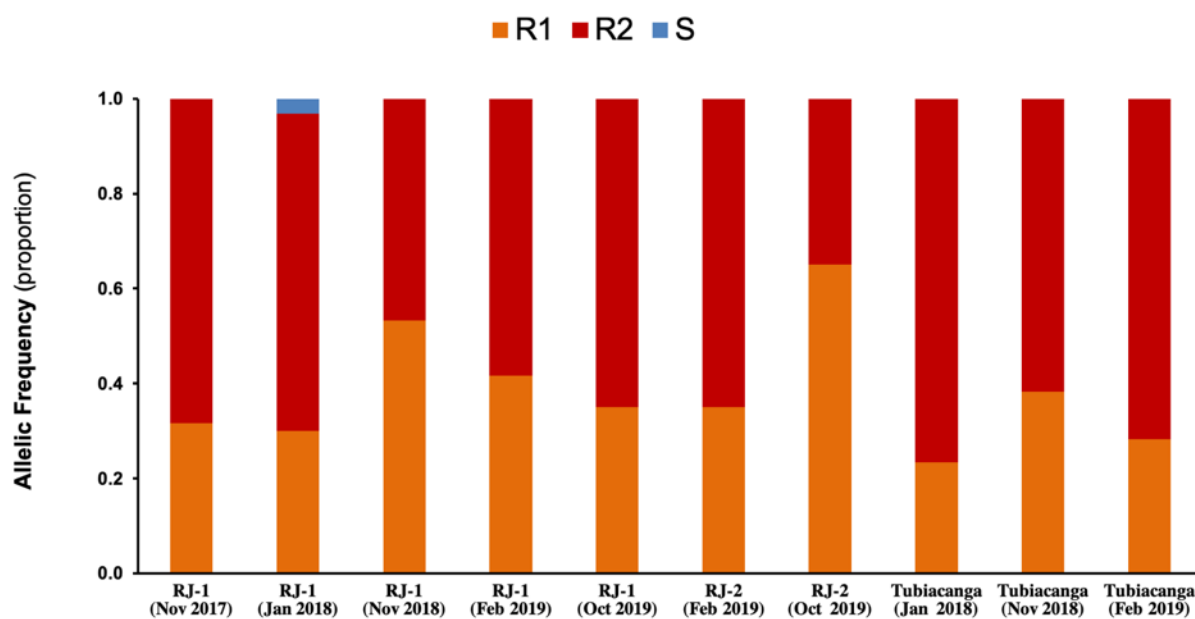

696

697

698
